# Supplementary material for: Association of Autofluorescent Advanced Glycation End Products (AGEs) with Frailty Components in Chronic Kidney Disease (CKD): Data from a Single-Center Cohort Study
Source: MDPI journal article supplement (doi:10.3390/cells12030438), 2023-01-29
Supplement: s1 [file s1]

**Table S1.** Concentration of AGEs and sRAGE isoforms classified according to the presence (yes) or absence (not) of alterations in the frailty domains.

| Frailty Domain                     | Variables                     | Not           | Yes           | <i>p</i>     |
|------------------------------------|-------------------------------|---------------|---------------|--------------|
| <i>Weight Loss</i>                 | AGEs (arbitrary unit)         | 2939±781      | 3400±805      | <b>0.016</b> |
|                                    | sRAGE (pg/mL)                 | 2331±1234     | 2463±1463     | 0.67         |
|                                    | esRAGE (pg/mL)                | 536 [382-718] | 589 [361-828] | 0.29         |
|                                    | cRAGE (pg/mL)                 | 1695±895      | 1693±1079     | 0.99         |
|                                    | AGEs/sRAGE (arbitrary unit)   | 1.6±0.9       | 1.9±1.2       | 0.23         |
|                                    | cRAGE/esRAGE (arbitrary unit) | 2.8±0.9       | 2.6±1.1       | 0.27         |
| <i>Weakness</i>                    | AGEs (arbitrary unit)         | 2937±836      | 3073±781      | 0.37         |
|                                    | sRAGE (pg/mL)                 | 2147±1198     | 2480±1307     | 0.17         |
|                                    | esRAGE (pg/mL)                | 467 [336-719] | 565 [418-761] | 0.16         |
|                                    | cRAGE (pg/mL)                 | 1561±865      | 1776±957      | 0.22         |
|                                    | AGEs/sRAGE (arbitrary unit)   | 2±1           | 2±1           | 0.13         |
|                                    | cRAGE/esRAGE (arbitrary unit) | 2.8±0.8       | 2.8±1         | 0.94         |
| <i>Exhaustion</i>                  | AGEs (arbitrary unit)         | 2995±863      | 3057±721      | 0.68         |
|                                    | sRAGE (pg/mL)                 | 2182±1163     | 2579±1381     | 0.09         |
|                                    | esRAGE (pg/mL)                | 486 [361-717] | 600 [402-895] | 0.31         |
|                                    | cRAGE (pg/mL)                 | 1554±814      | 1880±1034     | 0.06         |
|                                    | AGEs/sRAGE (arbitrary unit)   | 2±1           | 2±1           | 0.26         |
|                                    | cRAGE/esRAGE (arbitrary unit) | 2.6±0.8       | 2.7±1         | 0.75         |
| <i>Slowness</i>                    | AGEs (arbitrary unit)         | 2978±860      | 3091±702      | 0.46         |
|                                    | sRAGE (pg/mL)                 | 2336±1293     | 2383±1252     | 0.85         |
|                                    | esRAGE (pg/mL)                | 520 [365-747] | 555 [407-715] | 0.59         |
|                                    | cRAGE (pg/mL)                 | 1648±879      | 1770±1002     | 0.50         |
|                                    | AGEs/sRAGE (arbitrary unit)   | 1.7±1.0       | 1.6±0.8       | 0.69         |
|                                    | cRAGE/esRAGE (arbitrary unit) | 2.7±0.9       | 2.9±1         | 0.39         |
| <i>Low physical activity level</i> | AGEs (arbitrary unit)         | 3018±821      | 3027±786      | 0.95         |
|                                    | sRAGE (pg/mL)                 | 2273±1143     | 2449±1413     | 0.46         |
|                                    | esRAGE (pg/mL)                | 493 [389-716] | 561 [353-803] | 0.74         |
|                                    | cRAGE (pg/mL)                 | 1619±764      | 1784±1088     | 0.34         |
|                                    | AGEs/sRAGE (arbitrary unit)   | 1.7±1.0       | 1.6±0.9       | 0.76         |
|                                    | cRAGE/esRAGE (arbitrary unit) | 2.7±0.8       | 2.9±1.1       | 0.31         |

AGEs: Advanced Glycation End products; sRAGE: soluble receptor for AGE; esRAGE: endogenous secretory receptor for AGE; cRAGE: cleaved receptor for AGE. Data are expressed as mean with standard deviation. *p* values less than 0.05 are indicated in bold.

**Table S2.** Concentration of inflammatory markers and uremic toxins classified according to the presence (yes) or absence (not) of alterations in the frailty domains.

| Frailty Domain                     | Variables     | Not      | Yes      | <i>p</i>     |
|------------------------------------|---------------|----------|----------|--------------|
| <i>Weight Loss</i>                 | CRP, (mg/dL)  | 0.4±0.7  | 0.5±1.0  | 0.51         |
|                                    | TNFα, (pg/mL) | 14.0±7.8 | 15.3±7.5 | 0.53         |
| <i>Weakness</i>                    | CRP, (mg/dL)  | 0.4±0.7  | 0.5±0.8  | 0.75         |
|                                    | TNFα, (pg/mL) | 11.7±7.6 | 15.8±7.4 | <b>0.006</b> |
| <i>Exhaustion</i>                  | CRP, (mg/dL)  | 0.5±0.9  | 0.4±0.5  | 0.47         |
|                                    | TNFα, (pg/mL) | 13.8±8.4 | 14.7±6.8 | 0.55         |
| <i>Slowness</i>                    | CRP, (mg/dL)  | 0.4±0.7  | 0.5±0.8  | 0.78         |
|                                    | TNFα, (pg/mL) | 12.9±7.1 | 16.2±8.3 | <b>0.033</b> |
| <i>Low physical activity level</i> | CRP, (mg/dL)  | 0.4±0.6  | 0.6±0.8  | 0.16         |
|                                    | TNFα, (pg/mL) | 13.5±7.6 | 15±7.9   | 0.32         |

CRP: c-reactive protein; TNF $\alpha$ : Tumor necrosis factor alpha. Data are expressed as mean with standard. *p* values are intended for trend and values less than 0.05 are indicated in bold.

**Table S3.** Linear regression analyses of the association of AGEs and RAGEs with BMI, gait speed and handgrip weighted for creatinine clearance.

| Dependent variable                          | Variables               | B             | <i>p</i>     |
|---------------------------------------------|-------------------------|---------------|--------------|
| <i>BMI (kg/m<sup>2</sup>)</i>               | <b>R= 0.215 p=0.047</b> |               |              |
|                                             | AGEs, (A.U.)            | -0.127        | 0.19         |
|                                             | Cr. Cl. (mL/min)        | 0.119         | 0.22         |
|                                             | <b>R= 0.24 p=0.03</b>   |               |              |
|                                             | AGEs/sRAGE              | <b>-0.176</b> | <b>0.049</b> |
|                                             | Cr. Cl. (mL/min)        | <b>0.196</b>  | <b>0.03</b>  |
|                                             | <b>R= 0.213 p=0.048</b> |               |              |
|                                             | sRAGE (A.U.)            | 0.11          | 0.26         |
|                                             | Cr. Cl. (mL/min)        | <b>0.228</b>  | <b>0.02</b>  |
|                                             | <b>R= 0.174 p=0.18</b>  |               |              |
| <i>Gait test time (s)</i>                   | AGEs, (A.U.)            | <b>0.159</b>  | <b>0.06</b>  |
|                                             | Cr. Cl. (mL/min)        | -0.029        | 0.72         |
|                                             | <b>R= 0.131 p=0.38</b>  |               |              |
|                                             | AGEs/sRAGE              | 0.067         | 0.48         |
|                                             | Cr. Cl. (mL/min)        | -0.117        | 0.216        |
|                                             | <b>R= 0.130 p=0.37</b>  |               |              |
|                                             | sRAGE (A.U.)            | 0.051         | 0.57         |
|                                             | Cr. Cl. (mL/min)        | <b>0.318</b>  | <b>0.001</b> |
|                                             | <b>R= 0.198 p=0.10</b>  |               |              |
|                                             | AGEs, (A.U.)            | -0.026        | 0.8          |
| <i>Handgrip strenght (kg/m<sup>2</sup>)</i> | Cr. Cl. (mL/min)        | 0.183         | 0.09         |
|                                             | <b>R= 0.225 p=0.045</b> |               |              |
|                                             | AGEs/sRAGE              | -0.1          | 0.14         |
|                                             | Cr. Cl. (mL/min)        | <b>0.203</b>  | <b>0.02</b>  |
|                                             | <b>R= 0.201 p=0.07</b>  |               |              |
|                                             | sRAGE (A.U.)            | 0.077         | 0.44         |
|                                             | Cr. Cl. (mL/min)        | <b>0.225</b>  | <b>0.04</b>  |

BMI: Body Mass Index; AGEs: Advanced Glycation End products; sRAGE: soluble receptor for AGE; Cr. Cl., creatinine clearance; A.U.: Arbitrary unit.

**Table S4.** Linear regression analyses of the association of AGEs and RAGEs with BMI, gait test and handgrip strength weighted for age.

| Dependent variable            | Variables               | B             | <i>p</i>     |
|-------------------------------|-------------------------|---------------|--------------|
| <i>BMI (kg/m<sup>2</sup>)</i> | <b>R= 0.223 p=0.042</b> |               |              |
|                               | AGEs, (A.U.)            | <b>-0.183</b> | <b>0.049</b> |
|                               | Age, (years)            | -0.072        | 0.43         |
|                               | <b>R= 0.161 p=0.22</b>  |               |              |
|                               | AGEs/sRAGE              | <b>-0.156</b> | <b>0.06</b>  |
|                               | Age, (years)            | -0.073        | 0.43         |
|                               | <b>R= 0.093 p=0.613</b> |               |              |
|                               | sRAGE (A.U.)            | 0.023         | 0.80         |
|                               | Age, (years)            | -0.089        | 0.34         |
|                               | <b>R=0.347 p=0.001</b>  |               |              |
| <i>Gait test time (s)</i>     | AGEs, (A.U.)            | <b>0.142</b>  | <b>0.06</b>  |
|                               | Age, (years)            | <b>0.303</b>  | <b>0.001</b> |

|                                             |                        |               |              |
|---------------------------------------------|------------------------|---------------|--------------|
| <i>Handgrip strenght (kg/m<sup>2</sup>)</i> | <b>R=0.318 p=0.003</b> |               |              |
|                                             | AGEs/sRAGE             | 0.02          | 0.82         |
|                                             | Age, (years)           | <b>0.314</b>  | <b>0.001</b> |
|                                             | <b>R=0.321 p=0.002</b> |               |              |
|                                             | sRAGE (A.U.)           | 0.051         | 0.57         |
|                                             | Age, (years)           | <b>0.318</b>  | <b>0.001</b> |
|                                             | <b>R=0.566 p=0.000</b> |               |              |
|                                             | AGEs, (A.U.)           | -0.071        | 0.36         |
|                                             | Age, (years)           | <b>-0.554</b> | <b>0.000</b> |
|                                             | <b>R=0.561 p=0.000</b> |               |              |
|                                             | AGEs/sRAGE             | -0.02         | 0.8          |
|                                             | Age, (years)           | <b>-0.559</b> | <b>0.000</b> |
|                                             | <b>R=0.562 p=0.000</b> |               |              |
|                                             | sRAGE (A.U.)           | -0.026        | 0.74         |
|                                             | Age, (years)           | <b>-0.562</b> | <b>0.000</b> |

AGEs: Advanced Glycation End products; sRAGE: soluble receptor for AGE; A.U.: Arbitrary unit.
